# Supplementary material for: Variable Stroke Fatigue Test Technology for Aircraft Landing Gears
Source: Preprints.org preprint supplement (doi:10.20944/preprints202305.1208.v1), 2023-05-17
Supplement: Supplementary file 1 [file supplementary]

Institutional emails for authors：

Botao Hu ：[hubt@avic.com](mailto:hubt@avic.com)

Chao Chen: [chenchao@aviv.com](mailto:chenchao@aviv.com)

Xiangming Chen: [asrichenxm@avic.com](mailto:asrichenxm@avic.com)

Chun Zhang: [czhang@nwpu.edu.cn](mailto:czhang@nwpu.edu.cn)

Yanan Chai: [chaiyn@avic.com](mailto:chaiyn@avic.com)
